# Supplementary material for: High carriage of adherent invasive E. coli in wildlife and healthy individuals
Source: PubMed Central journal article supplement (PMC6001069; doi:10.1186/s13099-018-0248-7), 2018-06-14
Supplement: 13099_2018_248_MOESM1_ESM.pdf [file 13099_2018_248_MOESM1_ESM.pdf]

**Table 4:**

| Virulence gene name | Pathotype   | Primer sequence (5'-3')                                        | PCR product length (bp) | References   |
|---------------------|-------------|----------------------------------------------------------------|-------------------------|--------------|
| <i>stx-1</i>        | EHEC        | Fwd: GCAAAGAMGTATGTWGATTTCG<br>Rev: GWGCCACTATCAATCATCAG       | 107                     | [32]         |
| <i>stx-2</i>        |             | Fwd: AATGCAAATCAGTCGTCAC<br>Rev: TGCATCTCTGGTCATTGTAT          | 82                      | [32]         |
| <i>ipaC</i>         | EIEC        | Fwd: CCTCACCACAACTAAGTCTAGCA<br>Rev: TGCTGCGCAGAAAGGGTATT      | 175                     | [This study] |
| <i>estA</i>         | ETEC        | Fwd: CACCTTTCGCTCAGGATGCT<br>Rev: TTCATGCTTTCAGGACTACTTTTCATT  | 115                     | [This study] |
| <i>elt</i>          |             | Fwd: GGYAAAAGAGAAATGGTTAT<br>Rev: TCTCGGTCAGATATGYGATTC        | 142                     | [32]         |
| <i>tia</i>          | ETEC /UPEC  | Fwd: GGGTTATGCACGGGTACATCA<br>Rev: GCCAGATTCATTCCAGGAGGTA      | 61                      | [This study] |
| <i>bfpA</i>         | EPEC        | Fwd: CMGGTGTGATGTTTTACTAC<br>Rev: TGCCCAATATACARACCAT          | 109                     | [32]         |
| <i>eae</i>          | EPEC / EHEC | Fwd: GCTATAACRTCTTCATTGATC<br>Rev: RCTACTTTTTRAAATAGTCTCG      | 92                      | [32]         |
| <i>ehxA</i>         |             | Fwd: GCACCACAACCTTGAYAAACT<br>Rev: CCAGATTATTACCTACATTYTCAG    | 86                      | [32]         |
| <i>aggR</i>         | EAEC        | Fwd: TTTATCGCAATCAGATTAARC<br>Rev: GGACAACRCAAGCATCTAC         | 94                      | [32]         |
| pCVD432             |             | Fwd: AGACTCTGGCGAAAGACTGTATC<br>Rev: ATGGCTGTCTGTAATAGATGAGAAC | 194                     | [8]          |
| <i>afaD</i>         | DAEC        | Fwd: CGCACACGGGTTTTTCATGT<br>Rev: CCCCTTCCCGCCTTCT             | 153                     | [This study] |
